# Supplementary material
Source: PubMed Central journal article supplement (PMC7611471)
Supplement: EMS124650-supplement-Supplemental_Information.pdf [file EMS124650-supplement-Supplemental_Information.pdf]

# Figure S1

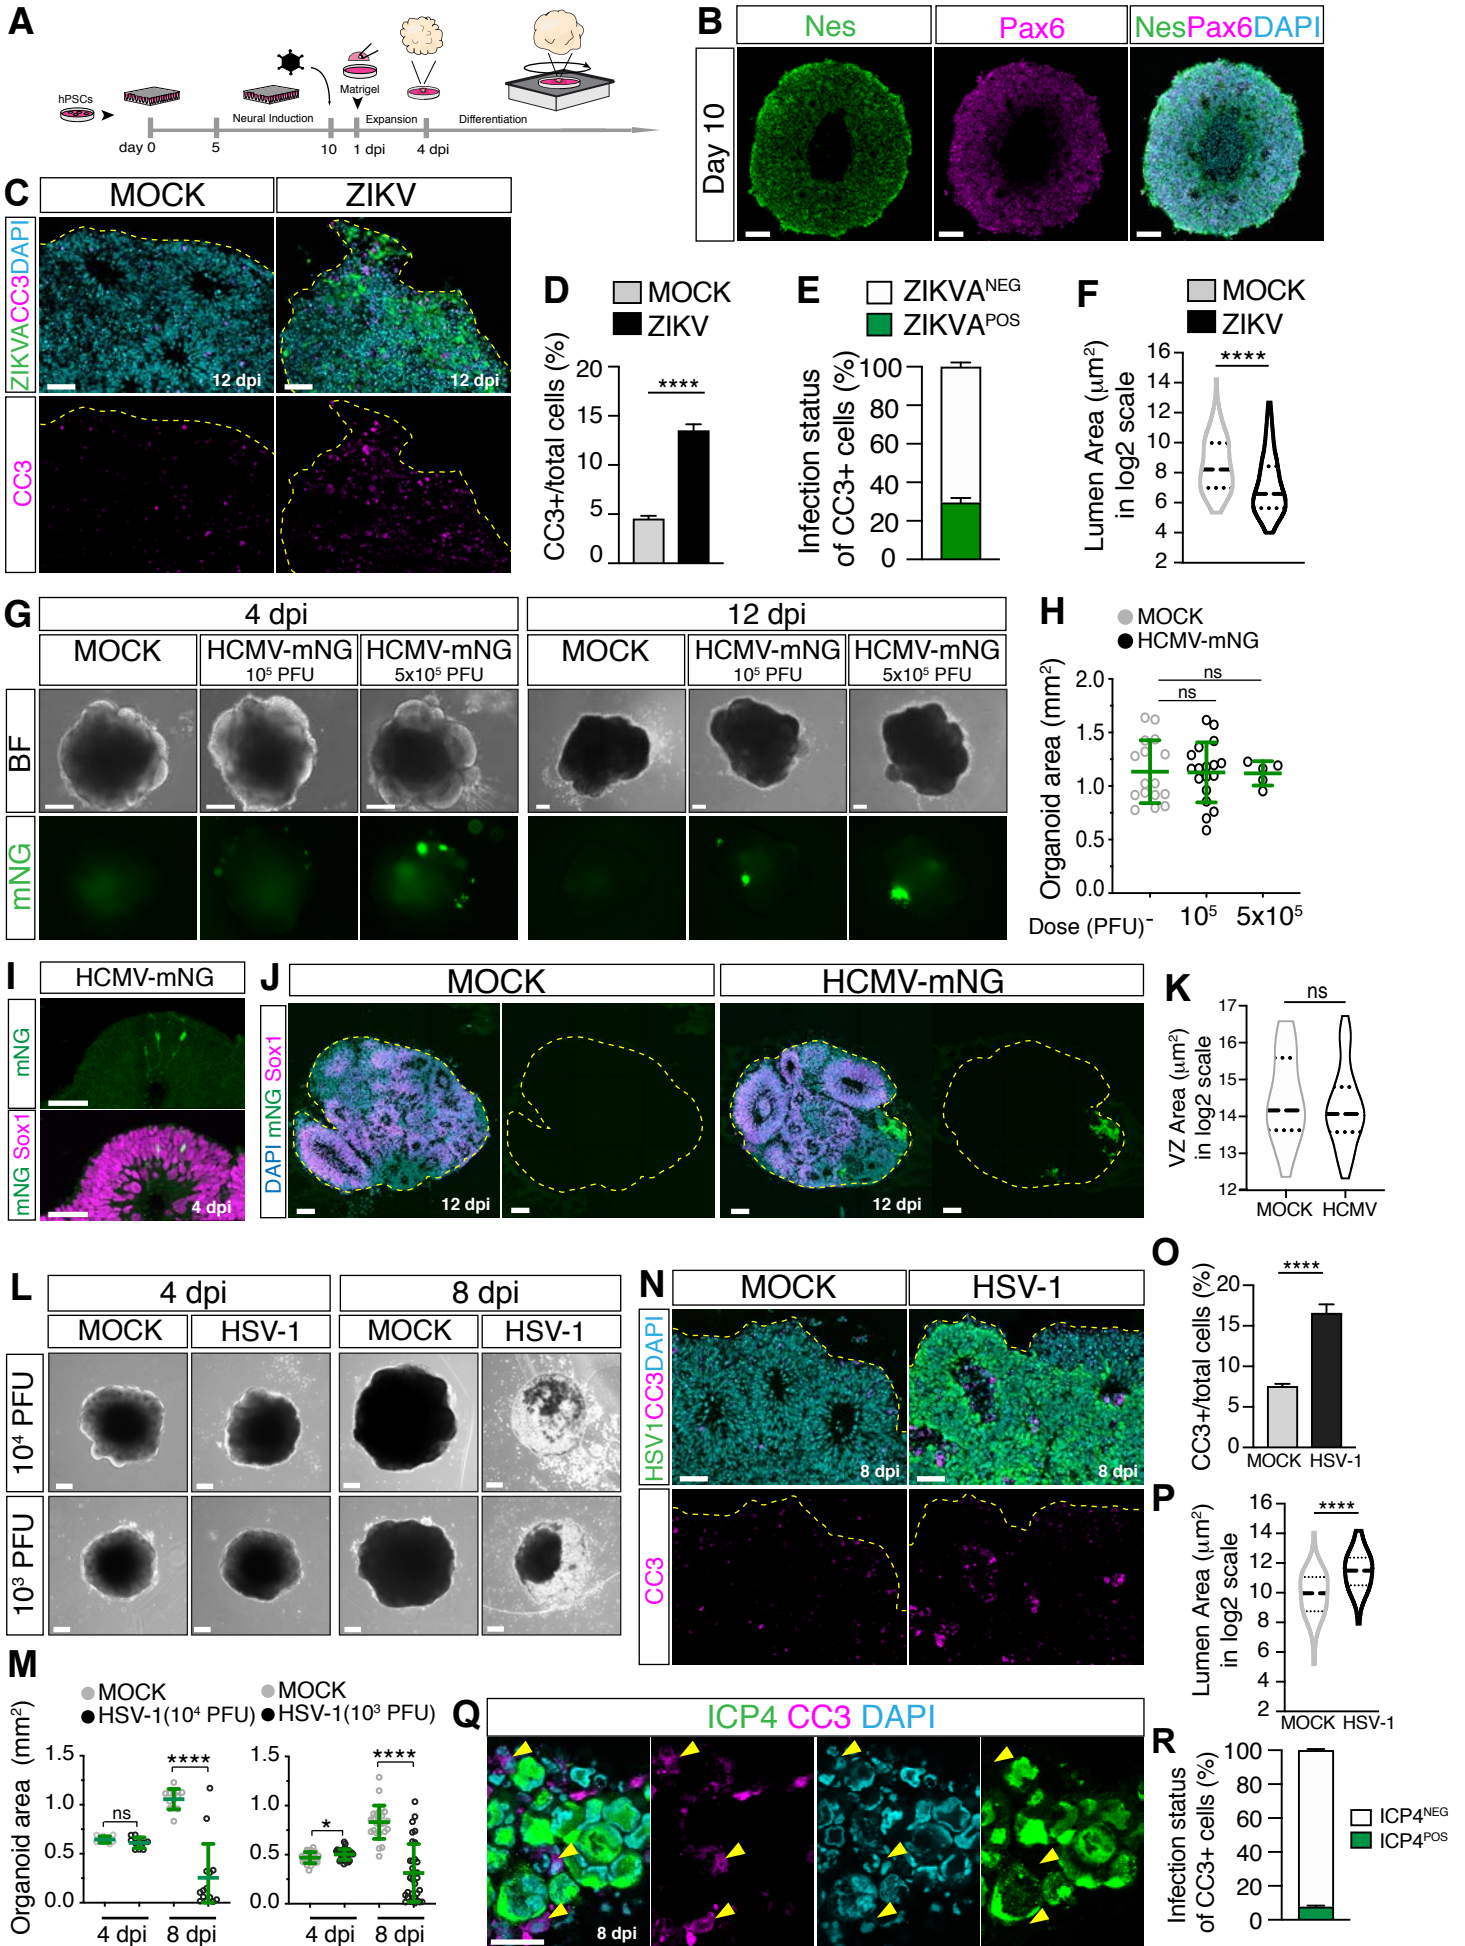

# Figure S2

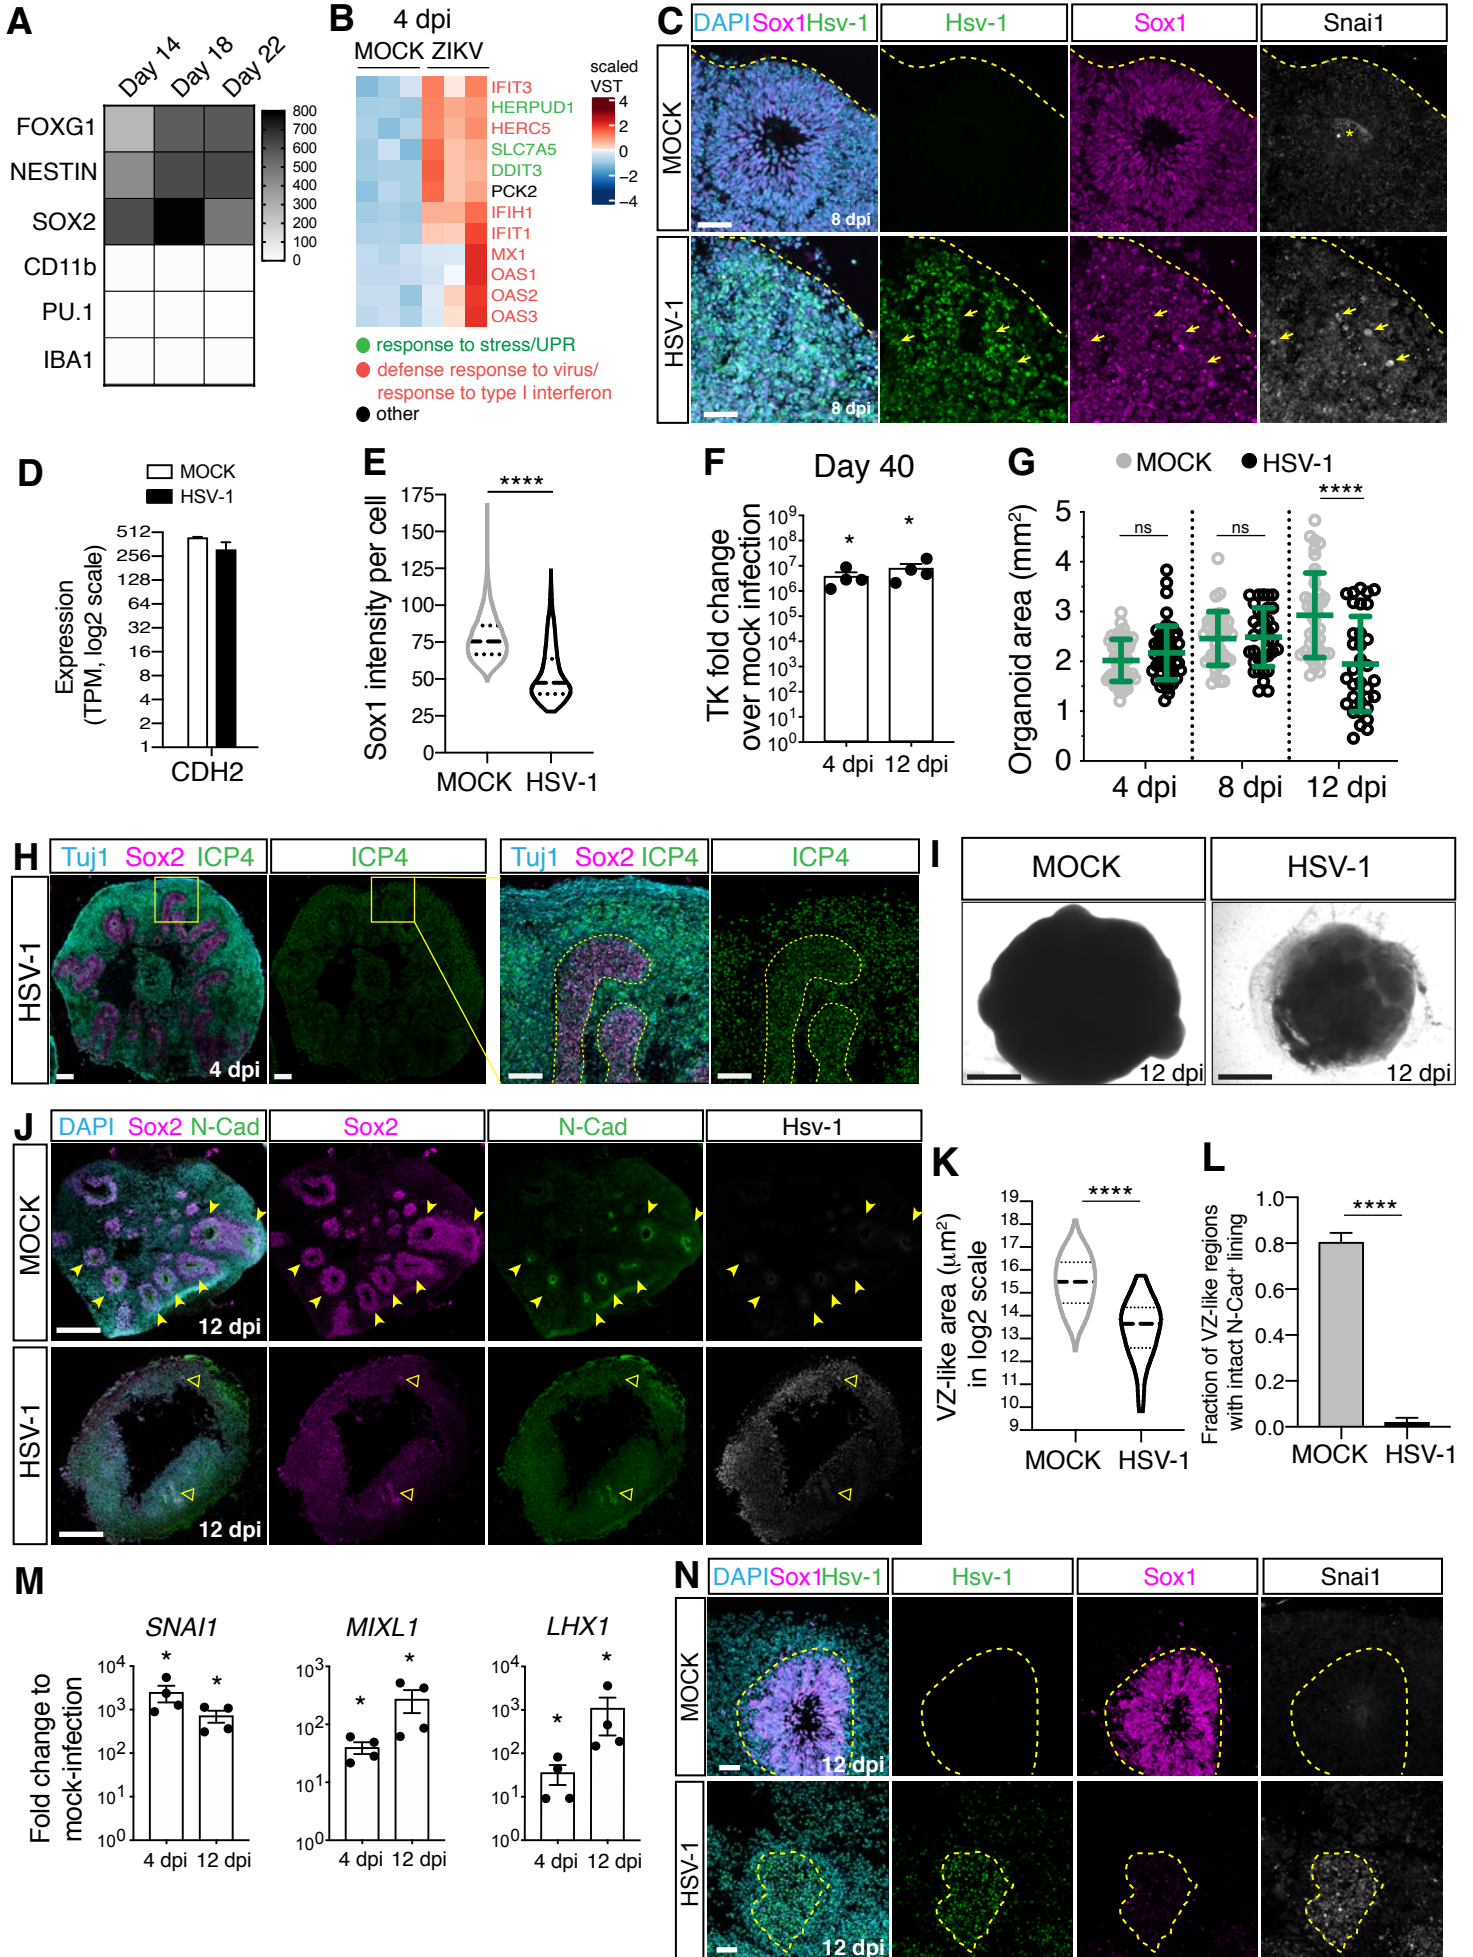

# Figure S3

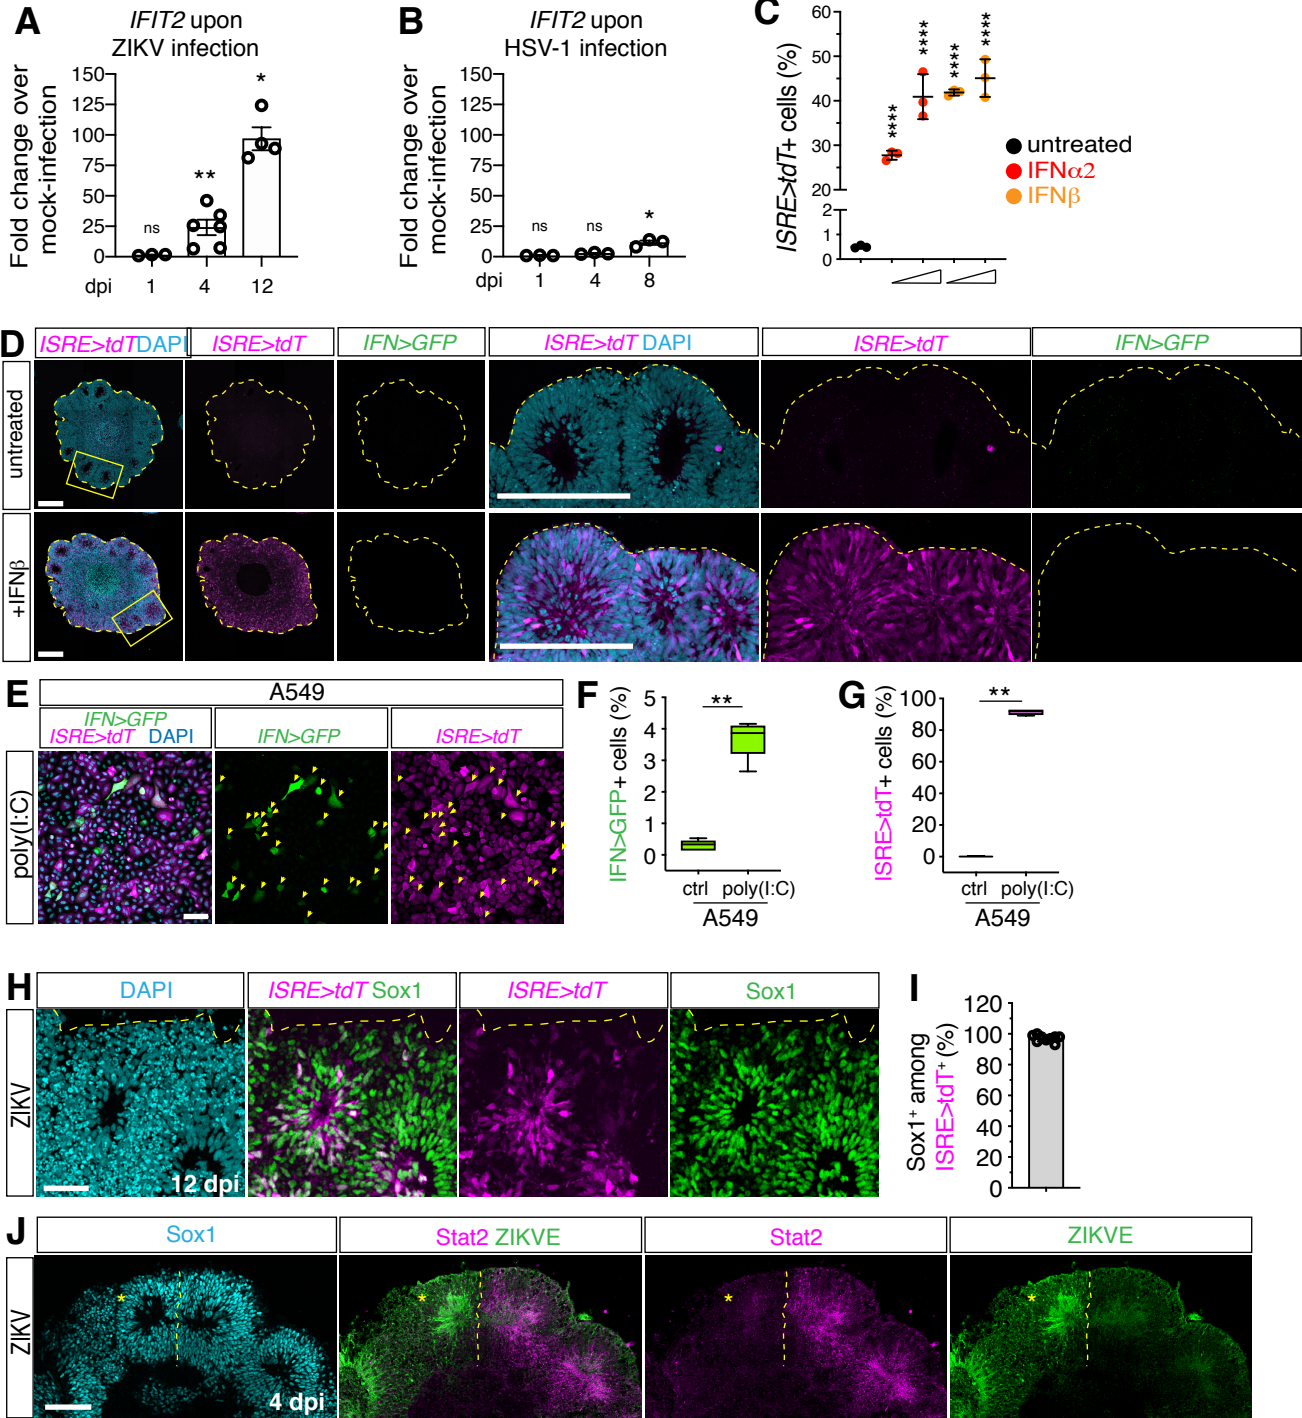

# Figure S4

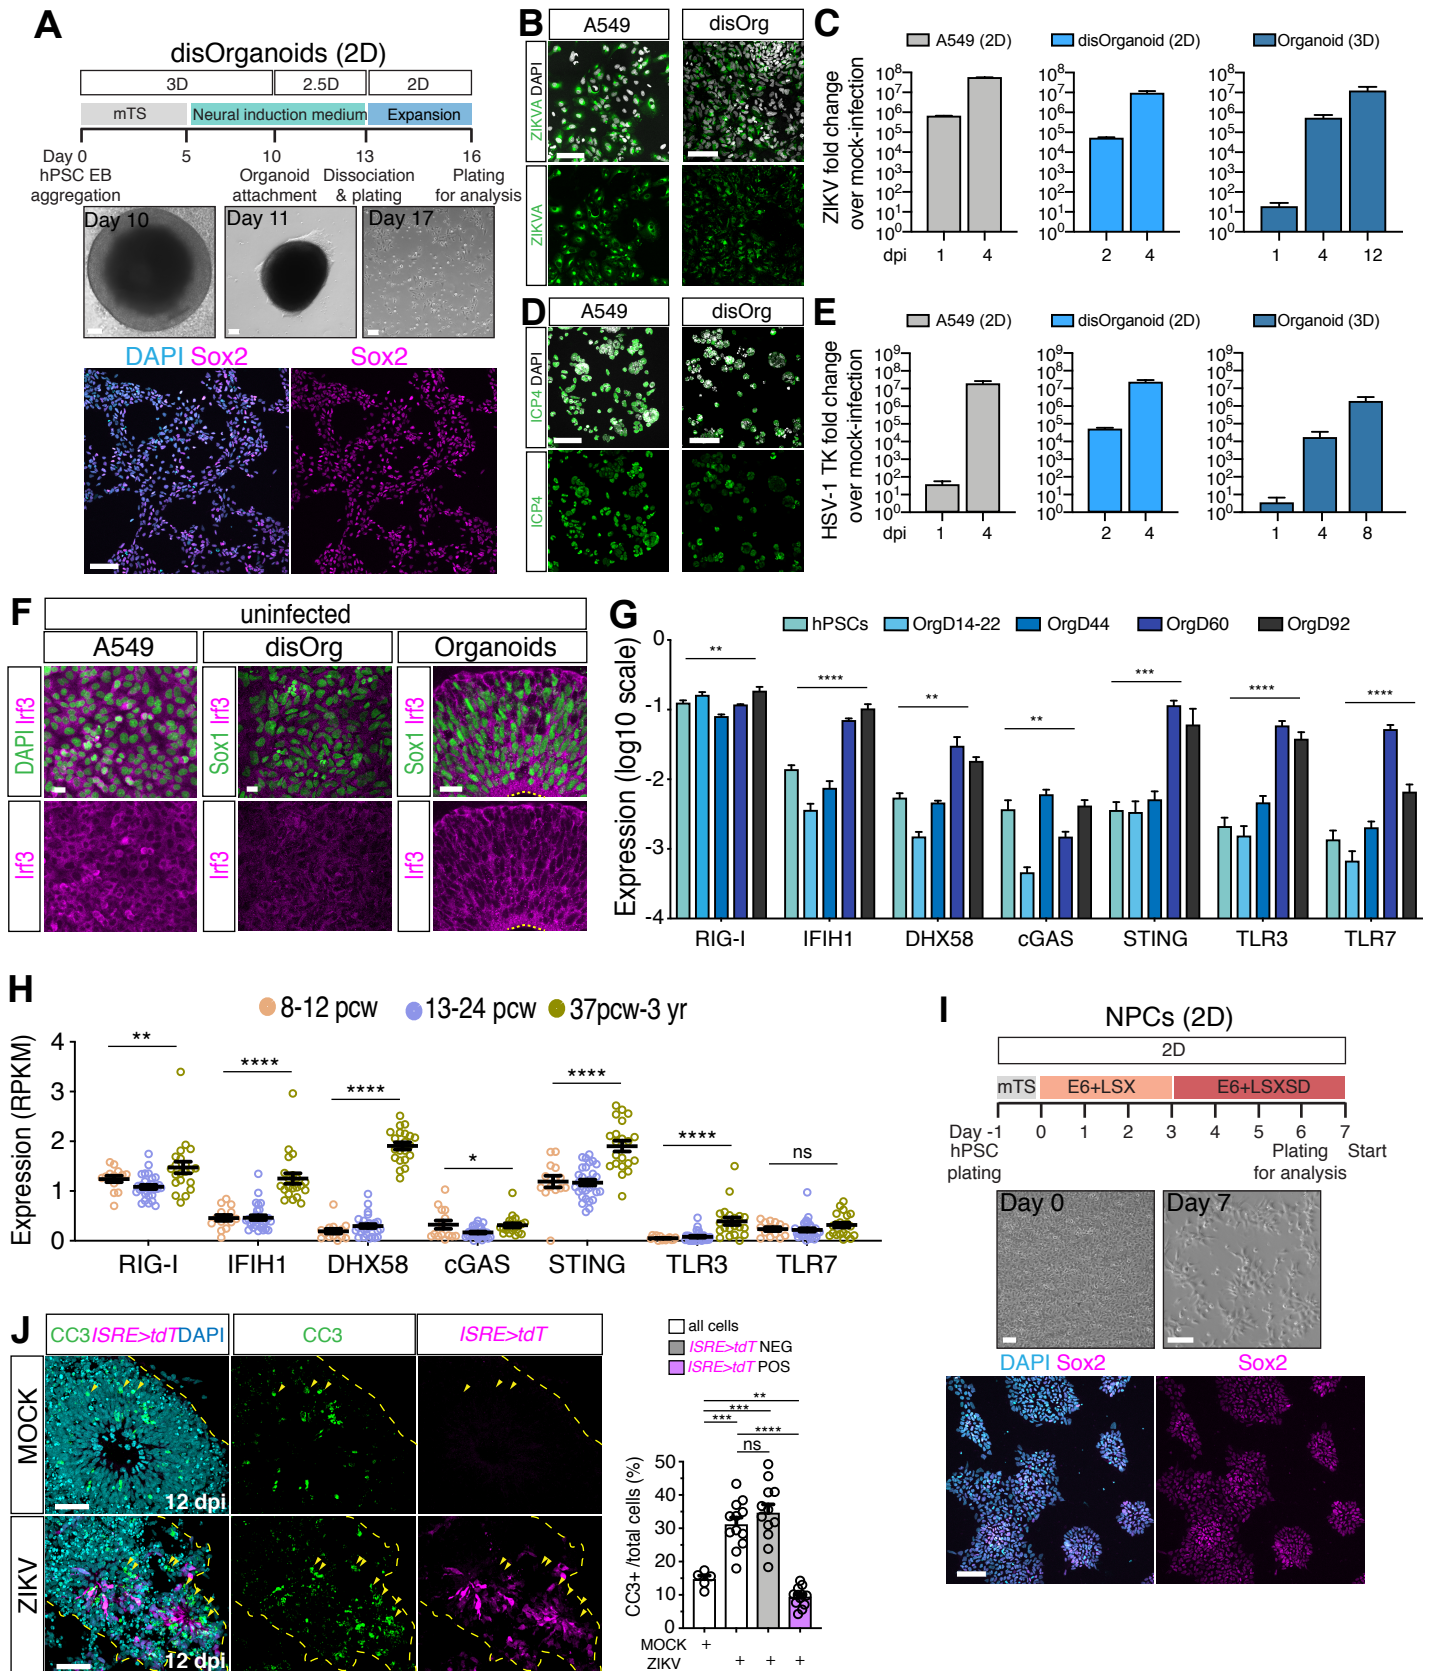

# Figure S5

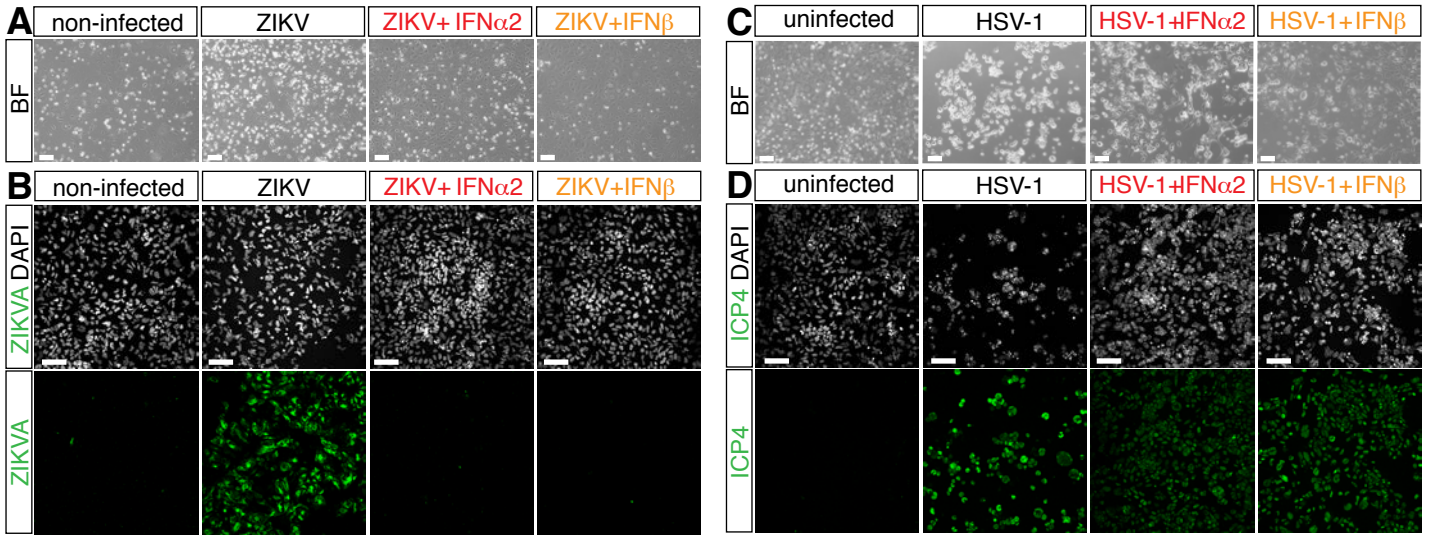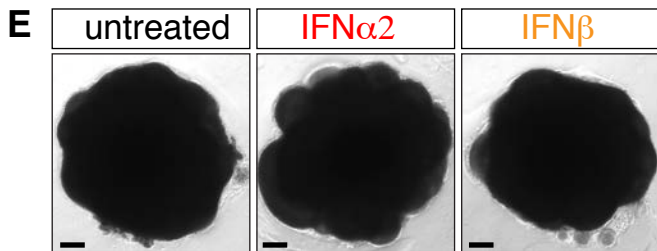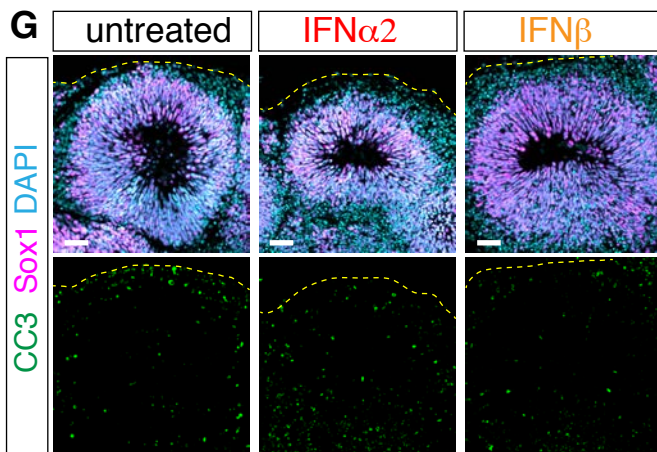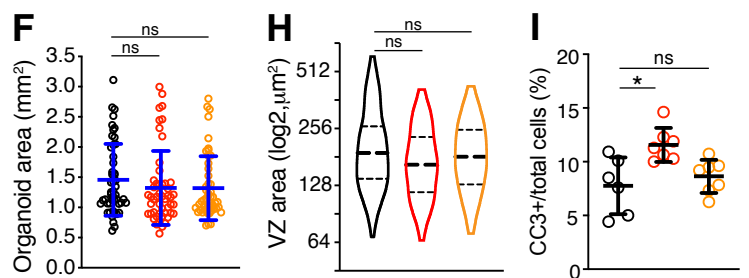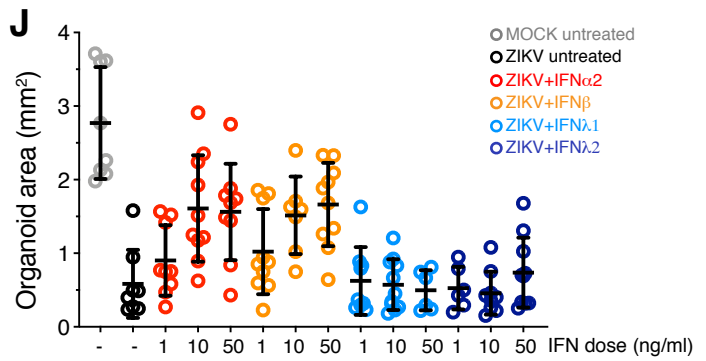

| Condition                 | Significance | Summary | Adjusted P value |
|---------------------------|--------------|---------|------------------|
| ZIKV vs. MOCK             | Yes          | ****    | <0.0001          |
| ZIKV vs. ZIKValpha_1ng    | No           | ns      | 0.8378           |
| ZIKV vs. ZIKValpha_10ng   | Yes          | ***     | 0.0008           |
| ZIKV vs. ZIKValpha_50ng   | Yes          | **      | 0.0022           |
| ZIKV vs. ZIKVbeta_1ng     | No           | ns      | 0.4566           |
| ZIKV vs. ZIKVbeta_10ng    | Yes          | **      | 0.0087           |
| ZIKV vs. ZIKVbeta_50ng    | Yes          | ***     | 0.0004           |
| ZIKV vs. ZIKVlambda1_1ng  | No           | ns      | 0.9998           |
| ZIKV vs. ZIKVlambda1_10ng | No           | ns      | >0.9999          |
| ZIKV vs. ZIKVlambda1_50ng | No           | ns      | 0.9996           |
| ZIKV vs. ZIKVlambda2_1ng  | No           | ns      | 0.9997           |
| ZIKV vs. ZIKVlambda2_10ng | No           | ns      | 0.9993           |
| ZIKV vs. ZIKVlambda2_50ng | No           | ns      | 0.999            |

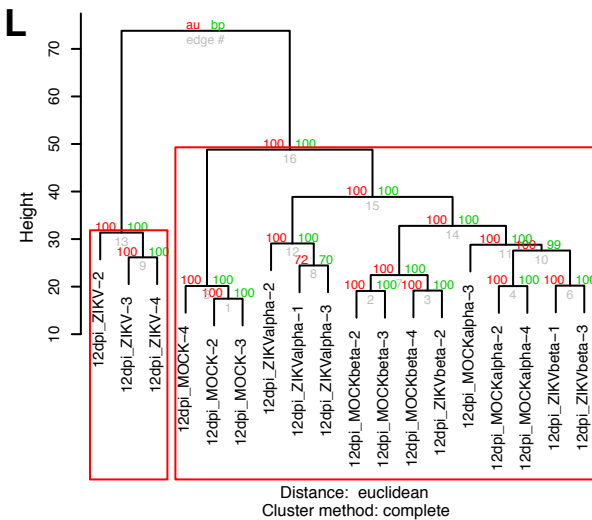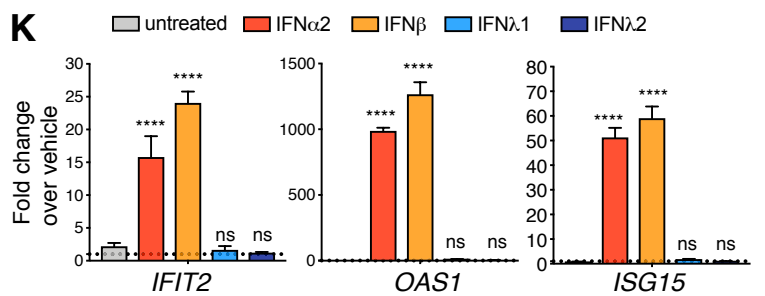

# Figure S6

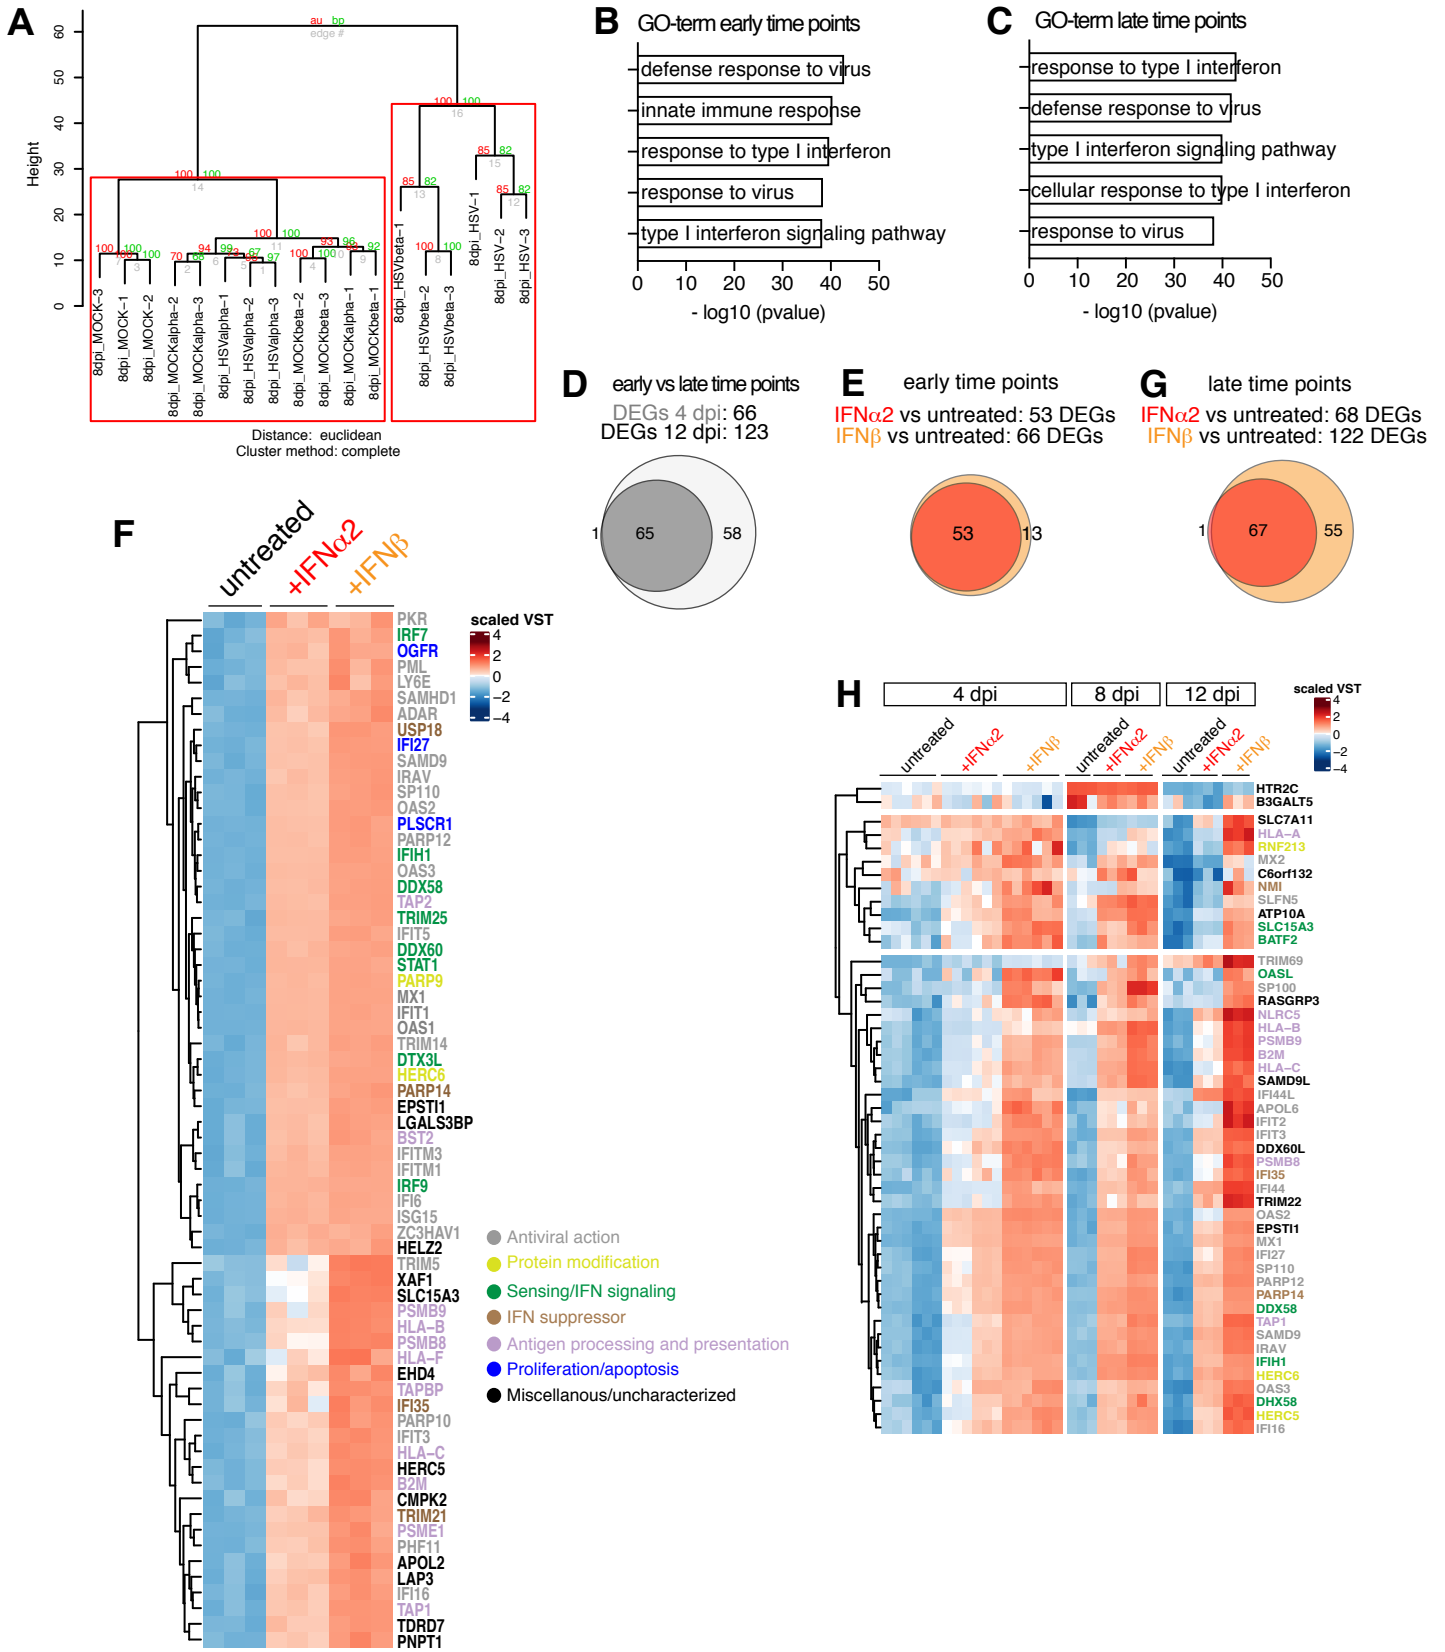

# Figure S7

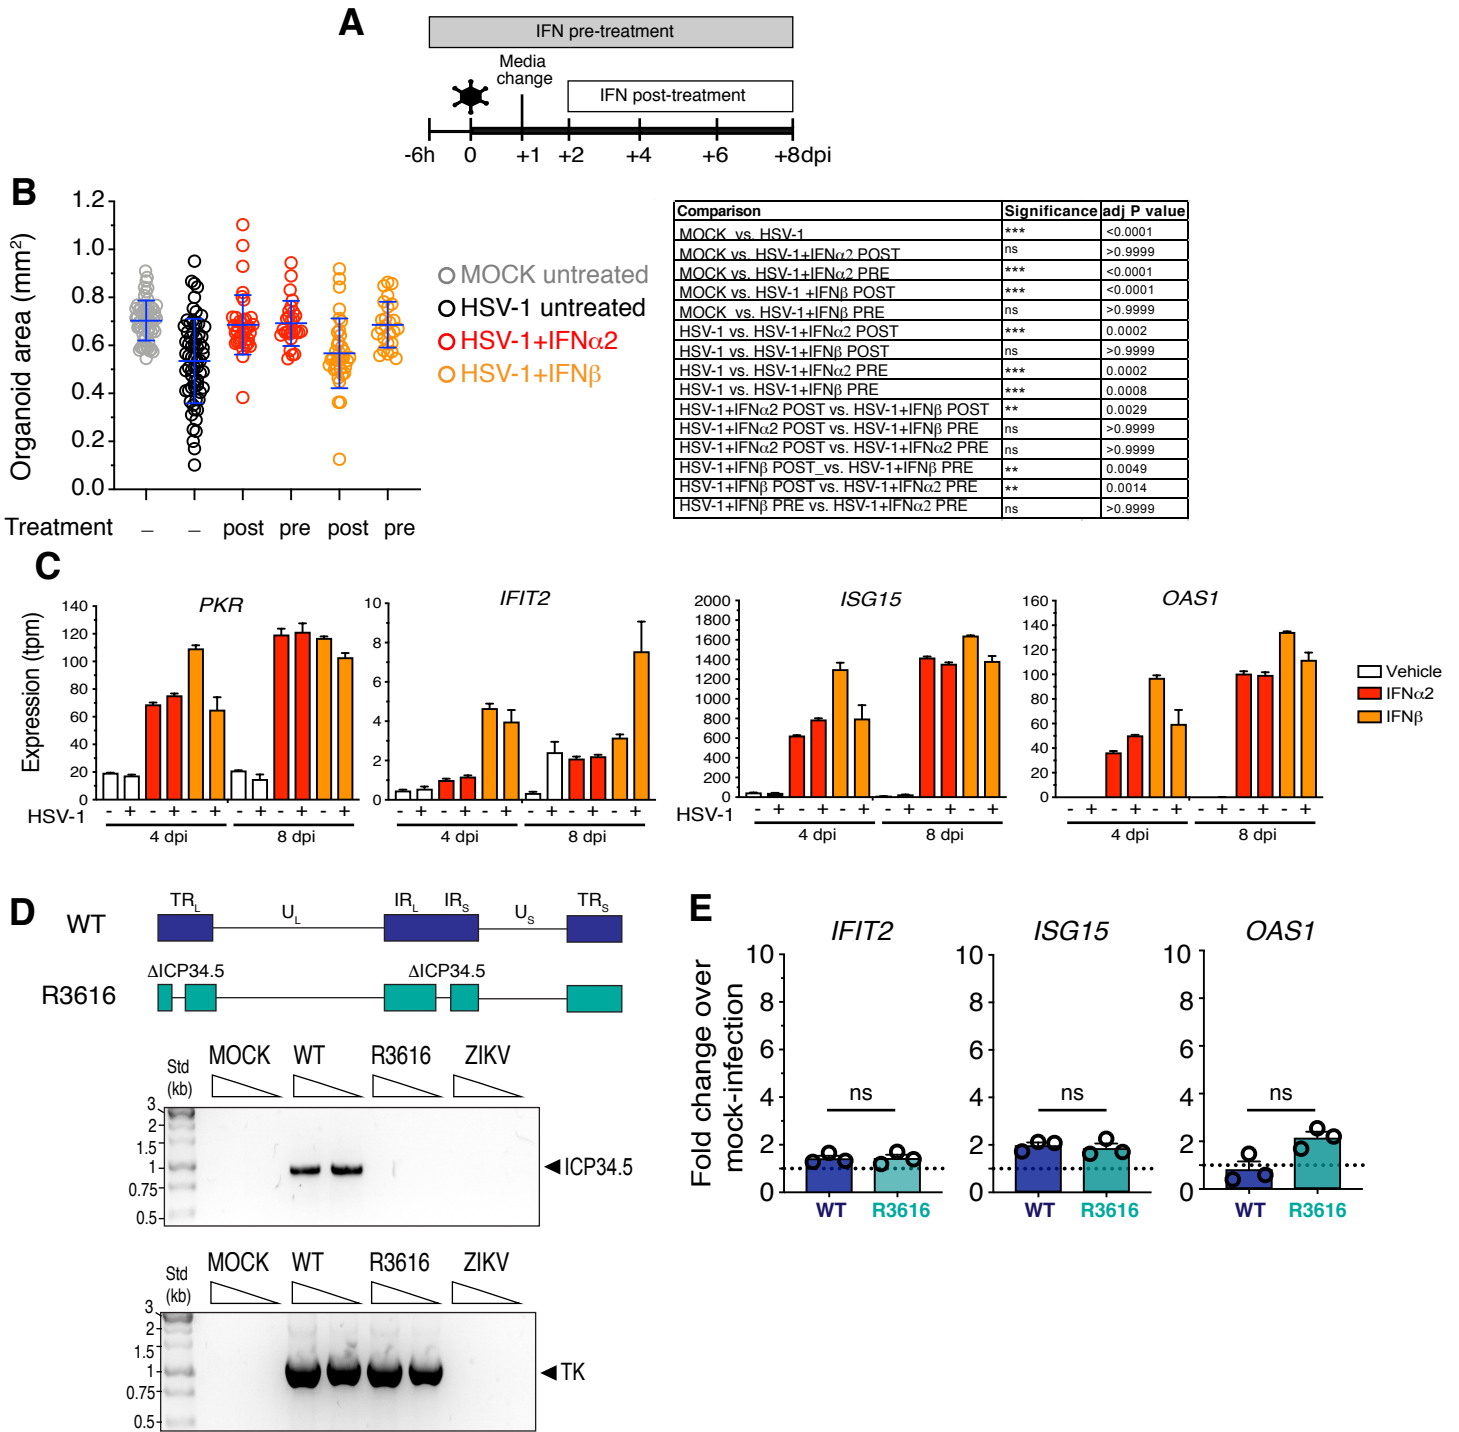

## SUPPLEMENTAL FIGURE LEGENDS

### Figure S1. ZIKV and HSV-1 infections impair organoid growth (related to Figure 1)

**A)** Schematic diagram of viral exposure of 10-days-old brain organoids used in this study. See STAR Methods for details.

**B)** Immunostaining (scale bars 100  $\mu\text{m}$ ) of 10-days-old organoids showing neuroectodermal identity.

**C-F)** Immunostaining (scale bars 50  $\mu\text{m}$ ) of organoids exposed to ZIKV or MOCK-treated. Dashed lines indicate organoid surface based on DAPI signal. Shown in D is the quantification of apoptosis measured by the fraction of cleaved caspase 3 (CC3) positive cells over total cells at 12 dpi. Shown in E is the quantification of infection status marked by Zika virus antigen (ZIKVA) of apoptotic cells (CC3+) in ZIKV-exposed organoids. Values represent mean  $\pm$  SEM (n=3 experiments with 21 regions from 12 MOCK organoids, n=17 regions from 14 ZIKV organoids; \*\*\*\* is  $p < 0.0001$ , Mann-Whitney test). Quantification of the lumen area is shown in F. Violin plots show median and quartiles (n=129 regions in MOCK organoids, n=110 regions in infected organoids from 3 experiments; \*\*\*\* is  $p < 0.0001$ , Mann-Whitney test).

**G-H)** Images (scale bars 200  $\mu\text{m}$ ) and area quantification of organoids exposed to Human Cytomegalovirus-mNeonGreen (HCMV-mNG) or MOCK-treated. Values are mean  $\pm$  SD and represent individual organoids ( $p > 0.9999$  for  $10^5$  PFU;  $p = 0.8417$  for  $5 \times 10^5$  PFU; Mann-Whitney test).

**I-K)** Immunostaining (scale bars 50  $\mu\text{m}$  in I, 100  $\mu\text{m}$  in J) and quantifications of the ventricular zone (VZ)-like area of organoids exposed to HCMV-mNG ( $5 \times 10^5$  PFU) or MOCK-treated and analyzed at 12 dpi. Dashed lines indicate organoid contour based on DAPI signal. Violin plots show median and quartiles (n=40 regions from 3 MOCK organoids, n=79 from 3 HCMV-mNG organoids;  $p = 0.2375$ ; Mann-Whitney test).

**L-M)** Images (scale bars 200  $\mu\text{m}$ ) and area measurements of organoids exposed to HSV-1 ( $10^4$  and  $10^3$  PFU). Values are mean  $\pm$  SD and represent individual organoids ( $p = 0.1397$   $10^4$  PFU 4 dpi;  $p = 0.0164$   $10^3$  PFU 4 dpi; \*\*\*\* is  $p < 0.0001$ , Mann-Whitney test).

**N-R)** Immunostaining (scale bar 50  $\mu\text{m}$  in N, 20  $\mu\text{m}$  in Q) of organoids exposed to HSV-1 or MOCK-treated. Dashed lines indicate organoid surface based on DAPI signal. Arrowheads in Q indicate CC3+ cells. Note the altered nuclear morphology and peripheral chromatin of ICP4 positive cells. Infected cell polypeptide 4 (ICP4) is an immediate-early viral protein produced during HSV-1 lytic infection. Values in O represent mean  $\pm$  SEM (n=3 experiments with 18 regions from 12 MOCK organoids and 16 regions from 12 HSV-1 organoids; \*\*\*\* is  $p < 0.0001$ , Mann-Whitney test). Violin plots in P represent median and quartiles (n= 35 regions from 4 MOCK organoids and n=35 from 9 HSV-1 organoids from 3 experiments; \*\*\*\* is  $p < 0.0001$ ; Mann-Whitney test). Shown in R is the quantification of infection status (marked by ICP4) in



organoids exposed to HSV-1. Values represent mean  $\pm$  SEM (n=3 experiments with a total of 16 regions from 12 organoids).

Dpi, days post-infection; ns, non-significant. See also Table S2. Pos, positive; Neg, negative.

**Figure S2. ZIKV and HSV-1 infections elicit distinct transcriptional responses (related to Figure 2)**

**A)** Heatmap showing high expression (>100 transcripts per million, tpm) of the neural progenitor markers *FOXP1*, *NESTIN* and *SOX2* in MOCK-treated organoids measured by RNA-sequencing. Low expression of the microglia/macrophage progenitor markers *CD11b*, *PU.1* and *IBA1* (<10 tpm) is shown for comparison.

**B)** Expression (in scaled Variance Stabilizing Transformation or VST) of differentially expressed genes in ZIKV-exposed vs MOCK-exposed organoids.

**C)** Immunostaining (scale bars 50  $\mu$ m) of organoids exposed to HSV-1 or MOCK-treated. Dashed lines indicate organoid surface based on DAPI signal. Arrows indicate nuclear Snai1 signal in infected organoids, while the asterisk marks apical Snai1 signal in mock-treated organoids.

**D)** Expression (in transcripts per million, tpm) of the N-cadherin gene *CDH2* measured by RNA-sequencing at 8 dpi. Values are mean  $\pm$  SD (n=3).

**E)** Quantification of Sox1 mean intensity per cell at 8 dpi. Values are median and quartiles (n=7961 cells from 4 MOCK organoids, n=5316 cells from 5 HSV-1 organoids; \*\*\*\* is p<0.0001, Mann-Whitney test).

**F)** RT-qPCR analysis of HSV-1 thymidine kinase (TK) gene expression in 40-days-old organoids exposed to HSV-1 over MOCK-treated samples. Values are mean  $\pm$  SEM (n=4 experiments, p=0.0286, Mann-Whitney test).

**G)** Area quantification of 40-days-old organoids infected with HSV-1 or MOCK-treated. Values are mean  $\pm$  SD and represent individual organoids (p=0.1846 4 dpi; p=0.7137 8dpi; \*\*\*\* is p<0.0001 12 dpi; Mann-Whitney test).

**H)** Immunostaining of 40-days-old organoids exposed to HSV-1. Dashed lines indicate ventricular zone (VZ) contour. Scale bars are 200  $\mu$ m and 100  $\mu$ m (insets).

**I-L)** Images, immunostaining (scale bars 500  $\mu$ m) and quantifications of 40-days-old organoids analyzed at 12 dpi. Arrowheads and triangles in J indicate normal and disrupted ventricular zone (VZ)-like regions in MOCK-treated and HSV-1-infected organoids respectively. Violin plots in K show median and quartiles (n=128 regions from 12 MOCK organoids and n=86 regions from 12 HSV-1 organoids from 3 experiments; \*\*\*\* is p<0.0001, Mann-Whitney test). Data in L are mean  $\pm$  SEM (n=3 experiments for a total of 18 regions for MOCK and 23 regions for HSV-1 organoids; \*\*\*\* is p<0.0001; Mann-Whitney test).

**M)** RT-qPCR analysis showing upregulation of the epithelial-mesenchymal transition (EMT) gene *SNAI1* and early mesodermal genes *MIXL1* and *LHX1* in 40-days-old organoids exposed to HSV-1 over MOCK-treated samples. Values are mean  $\pm$  SEM (n=4 experiments, p=0.0286 in all cases, Mann-Whitney test over age-matched MOCK controls).

**N)** Immunostaining (scale bars 50  $\mu$ m) of 40-days-old organoids exposed to HSV-1 or MOCK-treated. Dashed lines indicate VZ-like regions.

Dpi, days post-infection.

**Figure S3. ZIKV and HSV-1 infections differentially engage the IFN-I system (related to Figure 3)**

**A-B)** RT-qPCR analysis of *IFIT2* expression in organoids after ZIKV or HSV-1 exposure relative to their MOCK counterparts. Values are mean  $\pm$  SEM (ZIKV: p=0.7 1 dpi; p=0.0022 4 dpi; p=0.0286 12 dpi; HSV-1: p=0.4 1 dpi; p=0.7 4 dpi; p=0.0119 8 dpi; Mann-Whitney test comparisons over age-matched MOCK-treated counterparts).

**C)** Quantification of *ISRE>tdTomato* (*ISRE>tdT*) positive cells measured by flow cytometry in 12-days-old organoids carrying the dual reporter system and incubated with increasing doses of the indicated recombinant IFN-I (10 ng/ml and 50 ng/ml) for one day. Measurements are mean  $\pm$  SD (n=3; \*\*\*\* is p<0.0001, one-way ANOVA multiple comparisons over untreated).

**D)** Immunostaining (scale bars 200  $\mu$ m) of 14-days-old organoids carrying the dual reporter system and incubated for 48 hours with IFN $\beta$ . Dashed lines indicate organoid contour based on DAPI signal. Insets show a magnified view. Note the low expression of *IFN>GFP* and *ISRE>tdT* reporters in the untreated sample.

**E-G)** Immunostaining (scale bars 100  $\mu$ m) and quantifications of A549 cells engineered with the dual reporter system and analyzed 24 hours after stimulation with poly(I:C). Arrowheads indicate *IFN>GFP* positive cells. Graphs are Tukey plots (n=5; p=0.0043 in F, p=0.0043 in G, Mann-Whitney tests). Ctrl, control transfection.

**H-I)** Immunostaining (scale bars 50  $\mu$ m) and quantification of *ISRE>tdT* expressing cells in ZIKV-exposed organoids engineered with the dual reporter system. Dashed lines indicate organoid surface based on DAPI signal. Values are mean  $\pm$  SD (n=9 regions from 3 organoids).

**J)** Immunostaining (scale bars 100  $\mu$ m) of organoids exposed to ZIKV. Dashed lines separate the infected region (marked by an asterisk) from the uninfected area. ZIKVE, Zika virus Envelope protein.

dpi, days post-infection; ns, non-significant.

**Figure S4. The IFN-I response in brain organoids is more attenuated than in 2D cultures (related to Figure 4)**

**A)** Outline of the protocol used to generate 2D cultures of cells dissociated from organoids (disOrganoids) derived from human pluripotent stem cells (hPSCs). Immunostaining (scale bars 100  $\mu\text{m}$ ) at day 16 is shown at the bottom. mTS, mTeSR1; EB, embryoid body. See STAR Methods for details.

**B-E)** Immunostaining (scale bars 100  $\mu\text{m}$ ) of A549 cells and disOrganoid cultures (disOrg) exposed to ZIKV or HSV-1 and analyzed at 4 dpi. Shown in C and E are the quantifications of ZIKV vRNA and HSV-1 thymidine kinase (TK) expression levels by RT-qPCR showing a much faster kinetics of ZIKV and HSV-1 replication in 2D cultures compared to brain organoids. Values are mean  $\pm$  SEM (n=3 for A549, n=4 disOrg, n $\geq$ 3 Org; p values for ZIKV: p=0.1 A549 1 and 4 dpi; p=0.0286 disOrg 2 and 4 dpi; p=0.1 Org 1 dpi, p=0.0022 Org 4 dpi, p=0.0286 Org 12 dpi; p values for HSV-1: p=0.1 A549; p=0.0286 disOrg; p>0.9999 Org 1 dpi, p=0.4 Org 4 dpi, p=0.0079 Org 12 dpi; Mann-Whitney tests). Note that HSV-1 infection in 2D cultures induce the formation of multicellular structures.

**F)** Immunostaining (scale bars 20  $\mu\text{m}$ ) of uninfected cultures showing cytoplasmic Irf3 localization.

**G)** Expression of nucleic acid sensors measured by RT-qPCR in hPSCs and organoids at various stages. D, day; Org, organoids. Values are mean  $\pm$  SEM (n=4 for hPSCs, OrgD44, OrgD60; n=5 OrgD14-22; n=3 OrgD92; p=0.0024 RIG-I, p=0.0040 DHX58, p=0.0017 cGAS, p=0.0006 STING, \*\*\*\* is p<0.0001, one-way ANOVA).

**H)** Expression of nucleic acid sensors (in Reads Per Kilobase of transcript, per Million mapped reads, RPKM) in human fetal brains. Data were retrieved from the BrainSpan dataset (Miller et al., 2014) and include measurements from dorsolateral, ventrolateral and medial prefrontal cortex isolated from brains at various developmental ages. Values are mean  $\pm$  SEM (p=0.0016 RIG-I; p=0.0101 cGAS; p=0.1921 TLR7; \*\*\*\* is p<0.0001, one-way ANOVA). pcw, post conceptional week; yrs, years.

**I)** Outline of the protocol used to generate human neural progenitor cells (NPCs) via monolayer cultures. Immunostaining (scale bars 100  $\mu\text{m}$ ) at day 7 is shown at the bottom. See STAR Methods for details.

**J)** Immunostaining (scale bars 50  $\mu\text{m}$ ) and quantification of apoptosis in organoids carrying the dual reporter system, exposed to ZIKV or MOCK-treated. Dashed lines indicate organoid surface based on DAPI signal. Arrowheads indicate examples of tdTomato-negative CC3+ cells. CC3+ cells were scored regardless of their *ISRE>tdT* expression (all cells) or based on *ISRE>tdT* positive (POS) or negative (NEG) expression. Values are mean  $\pm$  SEM and represent individual regions from 3 organoids for MOCK and 4 for ZIKV (p=0.0002 ZIKV all vs

MOCK all;  $p=0.0002$  *ISRE>tdT* NEG vs MOCK all;  $p=0.003$  *ISRE>tdT* POS vs MOCK all;  $p=0.003$  *ISRE>tdT* POS vs MOCK all;  $p=0.3$  *ISRE>tdT* NEG vs ZIKV all;  $p<0.0001$  *ISRE>tdT* POS vs ZIKV all; unpaired t tests).

Dpi, days post-infection.

### **Figure S5. Effect of IFN-I in 2D and 3D cultures (related to Figure 5)**

**A-D)** Images and immunostaining (scale bars 100  $\mu\text{m}$ ) of 2D cultures of cells dissociated from organoids (disOrganoids) infected with ZIKV or HSV-1, treated with IFN-I and analyzed at 4 dpi. IFN-I were administered at 2 and 48 hours after exposure.

**E-I)** Images (in E, scale bars 200  $\mu\text{m}$ ) and immunostaining (in G, scale bars 50  $\mu\text{m}$ ) of uninfected organoids treated with IFN-I as described in Figure 5A and analyzed at 12 dpi. Dashed lines mark the organoid surface according to DAPI signal. Data in F are mean  $\pm$  SD and represent individual organoids ( $p=0.3296$  IFN $\alpha$ 2 vs untreated;  $p=0.5560$  IFN $\beta$  vs untreated, Kruskal-Wallis multiple comparisons tests). Violin plots in H show median and quartiles ( $n=105$  regions from 7 untreated organoids,  $n=103$  from 7 IFN $\alpha$ 2-treated organoids,  $n=119$  from 9 IFN $\beta$ -treated organoids;  $p=0.0907$  for IFN $\alpha$ 2 vs untreated;  $p>0.9999$  for IFN $\beta$  vs untreated, Kruskal-Wallis multiple comparisons test). Values in I represent mean  $\pm$  SD ( $n=6$  untreated regions,  $n=7$  IFN $\alpha$ 2-treated regions,  $n=7$  IFN $\beta$ -treated regions, from 2 organoids per condition;  $p=0.0218$  IFN $\alpha$ 2 vs untreated,  $p>0.9999$  IFN $\beta$  vs untreated, Kruskal-Wallis multiple comparisons tests). See also Table S2.

**J)** Area quantification of organoids exposed to ZIKV and treated with increasing doses of IFN-I and type III IFNs (IFN $\lambda$ 1 and IFN $\lambda$ 2) as described in Figure 5A. Organoids were analyzed at 12 dpi. Values are mean  $\pm$  SD and represent individual organoids (one-way ANOVA with Dunnett's multiple comparisons tests).

**K)** Quantification of ISG gene expression by RT-qPCR in 12-days-old organoids after incubation with the indicated interferons (IFNs) for one day. Values are mean  $\pm$  SEM ( $n=3$ ; *IFIT2*:  $p=0.9977$  IFN $\lambda$ 1,  $p=0.9832$  IFN $\lambda$ 2; *OAS1*:  $p=0.9992$  IFN $\lambda$ 1;  $p>0.9999$  IFN $\lambda$ 2; *ISG15*:  $p=0.9992$  IFN $\lambda$ 1;  $p>0.9999$  IFN $\lambda$ 2; \*\*\*\* is  $p<0.0001$ , one-way ANOVA with Tukey's multiple comparisons test to the untreated condition).

**L)** Dendrogram showing hierarchical clustering of ZIKV-infected organoids analyzed by RNA-sequencing. AU and BP values (%) are shown on the edges of the clustering. Red boxes indicate the main clusters identified with AU larger than 95%. AU, approximately unbiased; BP, bootstrap probability.

Dpi, days post-infection; ns, non-significant.

**Figure S6. IFN $\beta$  treatment fails to prevent HSV-1-induced organoid defects (related to Figure 6)**

**A)** Dendrogram showing hierarchical clustering of HSV-1-infected organoids treated with interferons as described in Figure 6A and analyzed by RNA-sequencing. AU and BP values (%) are shown on the edges of the clustering. Red boxes indicate the main clusters identified with AU larger than 95%. AU, approximately unbiased; BP, bootstrap probability.

**B-D)** Analysis of differentially expressed genes (DEGs) combined from IFN $\alpha$ 2-treated and IFN $\beta$ -treated samples vs untreated controls at early and late time points (corresponding to 4 and 12 dpi respectively). The top 5 GO-terms are shown.

**E-G)** Analysis of differentially expressed genes (DEGs) in IFN $\alpha$ 2-treated and IFN $\beta$ -treated samples vs untreated controls at early and late time points. VST, variance stabilizing transformation.

**H)** Time-resolved expression of genes differentially expressed in IFN $\alpha$ 2- or IFN $\beta$ -treated samples.

dpi, days post-infection.

**Figure S7. HSV-1 selectively counteracts IFN $\beta$  activity (related to Figure 7)**

**A-B)** Outline of IFN-I pre- and post-treatment experiments and area quantification of organoids at 8 dpi. Lines are mean  $\pm$  SD and represent individual organoids (Kruskal-Wallis multiple comparisons tests). See also Table S2.

**C)** Expression of the ISGs *PKR*, *IFIT2*, *ISG15* and *OAS1* measured by RNA-sequencing. Values represent mean  $\pm$  SEM (n=3).

**D)** Schematic diagram of a linearized DNA molecule of HSV-1 showing the relevant features of wild type (WT) HSV-1 and the deletion of both copies of the ICP34.5 gene in the R3616 mutant virus. HSV-1 genome consists of two covalently joined segments, L (long) and S (short), each comprising a unique region (U) flanked by a set of terminal and inverted repeats (TR and IR). Bottom panels show the PCR amplification products for ICP34.5 and thymidine kinase (TK) sequences from viral nucleic acids preparations and analyzed by electrophoresis. Std, size standards in kilobases (kb).

**E)** Expression of ISGs measured by RT-qPCR analysis in organoids infected with HSV-1 wild type or R3616 ( $10^2$  PFU) at 8 dpi. Data are mean  $\pm$  SEM (n=3;  $p > 0.9999$  *IFIT2*;  $p = 0.7$  *ISG15*;  $p = 0.1$  *OAS1*; Mann-Whitney test).

dpi, days post-infection; ns, non-significant.

## SUPPLEMENTAL ITEMS

**Table S1. Summary of TORCH infection experiments in early-stage organoids (related to Figure 1, S1 and 7)**

| <b>TORCH agent (strain)</b> | <b>Family (subfamily)</b>          | <b>Genome</b> | <b>Genome size (kb)</b> | <b>Target cell</b> | <b>Dose</b>                        | <b>Replication</b> | <b>Organoid growth phenotype</b> |
|-----------------------------|------------------------------------|---------------|-------------------------|--------------------|------------------------------------|--------------------|----------------------------------|
| ZIKV (French Polynesian)    | Flaviviridae                       | ssRNA(+)      | 10.7                    | hNPC               | 10 <sup>5</sup> TCID <sub>50</sub> | efficient          | attenuated                       |
| HCMV (TB40/E)               | Herpesviridae (Betaherpesvirinae)  | dsDNA         | 235                     | hNPC               | 10 <sup>5</sup> PFU                | inefficient        | none                             |
|                             |                                    |               |                         |                    | 5×10 <sup>5</sup> PFU              | inefficient        | none                             |
| HSV-1 (F)                   | Herpesviridae (Alphaherpesvirinae) | dsDNA         | 152                     | hNPC               | 10 <sup>4</sup> PFU                | efficient          | severely attenuated              |
|                             |                                    |               |                         |                    | 10 <sup>3</sup> PFU                | efficient          | severely attenuated              |
|                             |                                    |               |                         |                    | 10 <sup>2</sup> PFU                | efficient          | attenuated                       |
| HSV-1 R3616 (F)             | Herpesviridae (Alphaherpesvirinae) | dsDNA         | 152                     | hNPC               | 10 <sup>3</sup> PFU                | efficient          | attenuated                       |
|                             |                                    |               |                         |                    | 10 <sup>2</sup> PFU                | inefficient        | very mildly attenuated           |

**Table S2. Summary of organoids used in various experiments (related to Figure 1, S1, S2, 5, S5, 6, 7 and S7)**

| Figure | Experiment                                    | No. viral particles per organoid         | No. organoid batches (experiments) | Total no. organoids                                                                                                                                                                      |
|--------|-----------------------------------------------|------------------------------------------|------------------------------------|------------------------------------------------------------------------------------------------------------------------------------------------------------------------------------------|
| 1B     | ZIKV infection                                | 10 <sup>5</sup> TCID <sub>50</sub> units | 5                                  | n=35 MOCK 4 dpi<br>n=32 ZIKV 4 dpi<br>n=42 MOCK 8 dpi<br>n=28 ZIKV 8 dpi<br>n=46 MOCK 12 dpi<br>n=51 ZIKV 12 dpi                                                                         |
| S1H    | HCMV                                          | 10 <sup>5</sup> PFU                      | 3                                  | n=16 MOCK 12 dpi<br>n=18 HCMV 12 dpi                                                                                                                                                     |
| S1H    | HCMV                                          | 5×10 <sup>5</sup> PFU                    | 1                                  | n=6 MOCK 12 dpi<br>n=5 HCMV 12 dpi                                                                                                                                                       |
| S1M    | HSV-1 infection                               | 10 <sup>4</sup> PFU                      | 2                                  | n=9 MOCK 4 dpi<br>n=10 HSV-1 4 dpi<br>n=13 MOCK 8 dpi<br>n=14 HSV 8 dpi                                                                                                                  |
| S1M    | HSV-1 infection                               | 10 <sup>3</sup> PFU                      | 2                                  | n=29 MOCK 4 dpi<br>n=37 HSV-1 4 dpi<br>n=25 MOCK 8 dpi<br>n=32 HSV-1 8 dpi                                                                                                               |
| 1I     | HSV-1 infection                               | 10 <sup>2</sup> PFU                      | 3                                  | n=58 MOCK 4 dpi<br>n=74 HSV-1 4 dpi<br>n=72 MOCK 8 dpi<br>n=87 HSV-1 8 dpi                                                                                                               |
| S2G    | HSV-1 infection (day 40)                      | 6×10 <sup>2</sup> PFU                    | 5                                  | n=52 MOCK 4 dpi<br>n=51 HSV-1 4 dpi<br>n=40 MOCK 8 dpi<br>n=35 HSV-1 8 dpi<br>n=40 MOCK 12 dpi<br>n=33 HSV-1 12 dpi                                                                      |
| 5C     | IFN-I treatment against ZIKV                  | 10 <sup>5</sup> TCID <sub>50</sub> units | 3                                  | n=26 MOCK 12 dpi<br>n=22 ZIKV 12 dpi<br>n=29 ZIKV+IFN $\alpha$ 2 12 dpi<br>n=25 ZIKV+IFN $\beta$ 12 dpi                                                                                  |
| S5F    | IFN-I treatment                               | none                                     | 5                                  | n=49 untreated<br>n=50 IFN $\alpha$ 2<br>n=50 IFN $\beta$                                                                                                                                |
| 6C     | IFN-I treatment against HSV-1                 | 10 <sup>2</sup> PFU                      | 3                                  | n=72 MOCK 8 dpi<br>n=87 HSV-1 8 dpi<br>n=54 HSV-1+IFN $\alpha$ 2 8 dpi<br>n=68 HSV-1+IFN $\beta$ 8 dpi                                                                                   |
| 7K     | IFN-I treatment against HSV-1 R3616           | 10 <sup>2</sup> PFU                      | 1                                  | n=17 MOCK 8 dpi<br>n=22 R3616 8 dpi<br>n=11 R3616+IFN $\alpha$ 2 8 dpi<br>n=11 R3616+IFN $\beta$ 8 dpi                                                                                   |
| S7B    | IFN-I pre and post treatment against HSV-1 WT | 10 <sup>2</sup> PFU                      | 5                                  | n=97 MOCK 8 dpi<br>n=107 HSV-1 8 dpi<br>n=40 HSV-1+postIFN $\alpha$ 2 8 dpi<br>n=44 HSV-1+preIFN $\alpha$ 2 8 dpi<br>n=37 HSV-1+postIFN $\beta$ 8 dpi<br>n=41 HSV-1+preIFN $\beta$ 8 dpi |

**Table S3. Differential gene expression in infected versus MOCK organoids (related to Figure 2 and S2)**

A-B) Differentially expressed genes (DEGs) in ZIKV-exposed versus MOCK-exposed organoids at 12 days post-infection (dpi, A) and in HSV-1-exposed versus MOCK-exposed organoids at 8 dpi (B).

**Table S4. Primer sequences used for RT-qPCR (related to STAR Methods)**

| Target and sequences                                                                            | SOURCE                      | IDENTIFIER  |
|-------------------------------------------------------------------------------------------------|-----------------------------|-------------|
| Primers TBP:<br>forward 5->3 GGGCACCCTCCACTGTATC<br>reverse 5->3 CGAAGTCCAATGGTCTTTAGG          | This study                  | N/A         |
| Primers IFNA:<br>Forward 5->3 CGATGGCCTCGCCCTTTGCTTTA<br>Reverse 5->3 GGGTCTCAGGGAGATCACAGCCC   | (Paijo et al., 2016)        | N/A         |
| Primers IFNB1:<br>Forward 5->3 TGTGGCAATTGAATGGGAGGCTTGA<br>Reverse 5->3 TCAATGCGGCGTCCCTCTTCTG | (Paijo et al., 2016)        | N/A         |
| Primers ISG15:<br>Forward 5->3 TGTCGGTGTGAGAGCTGAAG<br>Reverse 5->3 AGAGGTTTCGTCGATTTGTC        | This study                  | N/A         |
| Primers IFIT2:<br>Forward 5->3 CAGCTGAGAATTGCACTGCAA<br>Reverse 5->3 CGTAGGCTGCTCTCCAAGGA       | This study                  | N/A         |
| Primers OAS1:<br>Forward 5->3 TGACTGGCGGTATAAACC<br>Reverse 5->3 TGGGCTGTGTTGAAATGTGT           | This study                  | N/A         |
| Primers RIG-I:<br>Forward 5->3 AGTGAGCATGCACGAATGAA<br>Reverse 5->3 GGGATCCCTGAAACACTTT         | (Hamel et al., 2015)        | N/A         |
| Primers IFIH1:<br>Forward 5->3 GCCATTGCAGATGCAACCAG<br>Reverse 5->3 TTGCGATTTCTTCTTTTGCAG       | (Hamel et al., 2015)        | N/A         |
| Primers DHX58:<br>Forward 5->3 GCCCTCGGGGTATCATCTTC<br>Reverse 5->3 CCCGGATGTCCACAGTCTG         | Primer Bank                 | 149408121c3 |
| Primers TLR3:<br>Forward 5->3 TTGCCTTGTATCTACTTTTGGGG<br>Reverse 5->3 TCAACACTGTTATGTTTGTGGGT   | Primer Bank                 | 19718735c1  |
| Primers TLR7:<br>Forward 5->3 TCCTTGGGGCTAGATGGTTTC<br>Reverse 5->3 TCCACGATCACATGGTTCTTTG      | Primer Bank                 | 67944638c1  |
| Primers cGAS:<br>Forward 5->3 CCCAAGCATGCAAAGGAAGG<br>Reverse 5->3 ACAATCTTTCCTGCAACATTTCT      | (Paijo et al., 2016)        | N/A         |
| Primers STING:<br>Forward 5->3 CACCTGTGTCCTGGAGTACG<br>Reverse 5->3 CATCTGCAGGTTCCCTGGTAGG      | (Paijo et al., 2016)        | N/A         |
| Primers TK:<br>Forward 5->3 ACCCGCTTAACAGCGTCAACA<br>Reverse 5->3 CCAAAGAGGTGCGGGAGTTT          | (Ferenczy and DeLuca, 2009) | N/A         |
| Primers ACTIN:<br>Forward 5->3 AAATCTGGCACCACACCTTC<br>Reverse 5->3 AGAGGCGTACAGGGATAGCA        | (Lancaster et al., 2013)    | N/A         |
| Primers SNAI1:<br>Forward 5->3 TCGGAAGCCTAACTACAGCGA<br>Reverse 5->3 AGATGAGCATTGGCAGCGAG       | Primer Bank                 | 301336132c1 |
| Primers MIXL1:<br>Forward 5->3 GGCGTCAGAGTGGGAAATCC<br>Reverse 5->3 GGCAGGCAGTTCACATCTACC       | Primer Bank                 | 13994334c1  |
| Primers LHX1:<br>Forward 5->3 CCTGGACCGCTTTCTCTTGAA<br>Reverse 5->3 ACCGAAACACCGGAAGAAGTC       | Primer Bank                 | 314122156c1 |
| Primers ZIKV:<br>ZIKA835 5->3 TTGGTCATGATACTGCTGATTGC<br>ZIKA911c 5->3 CCTTCCACAAAGTCCCTATTGC   | (Lanciotti et al., 2008)    | N/A         |
